# Supplementary material for: Elevated expression of the RNA-binding protein IGF2BP1 enhances the mRNA stability of INHBA to promote the invasion and migration of esophageal squamous cancer cells
Source: Springer Nature journal article supplement (doi:10.1186/s40164-023-00429-8), 2023-08-29

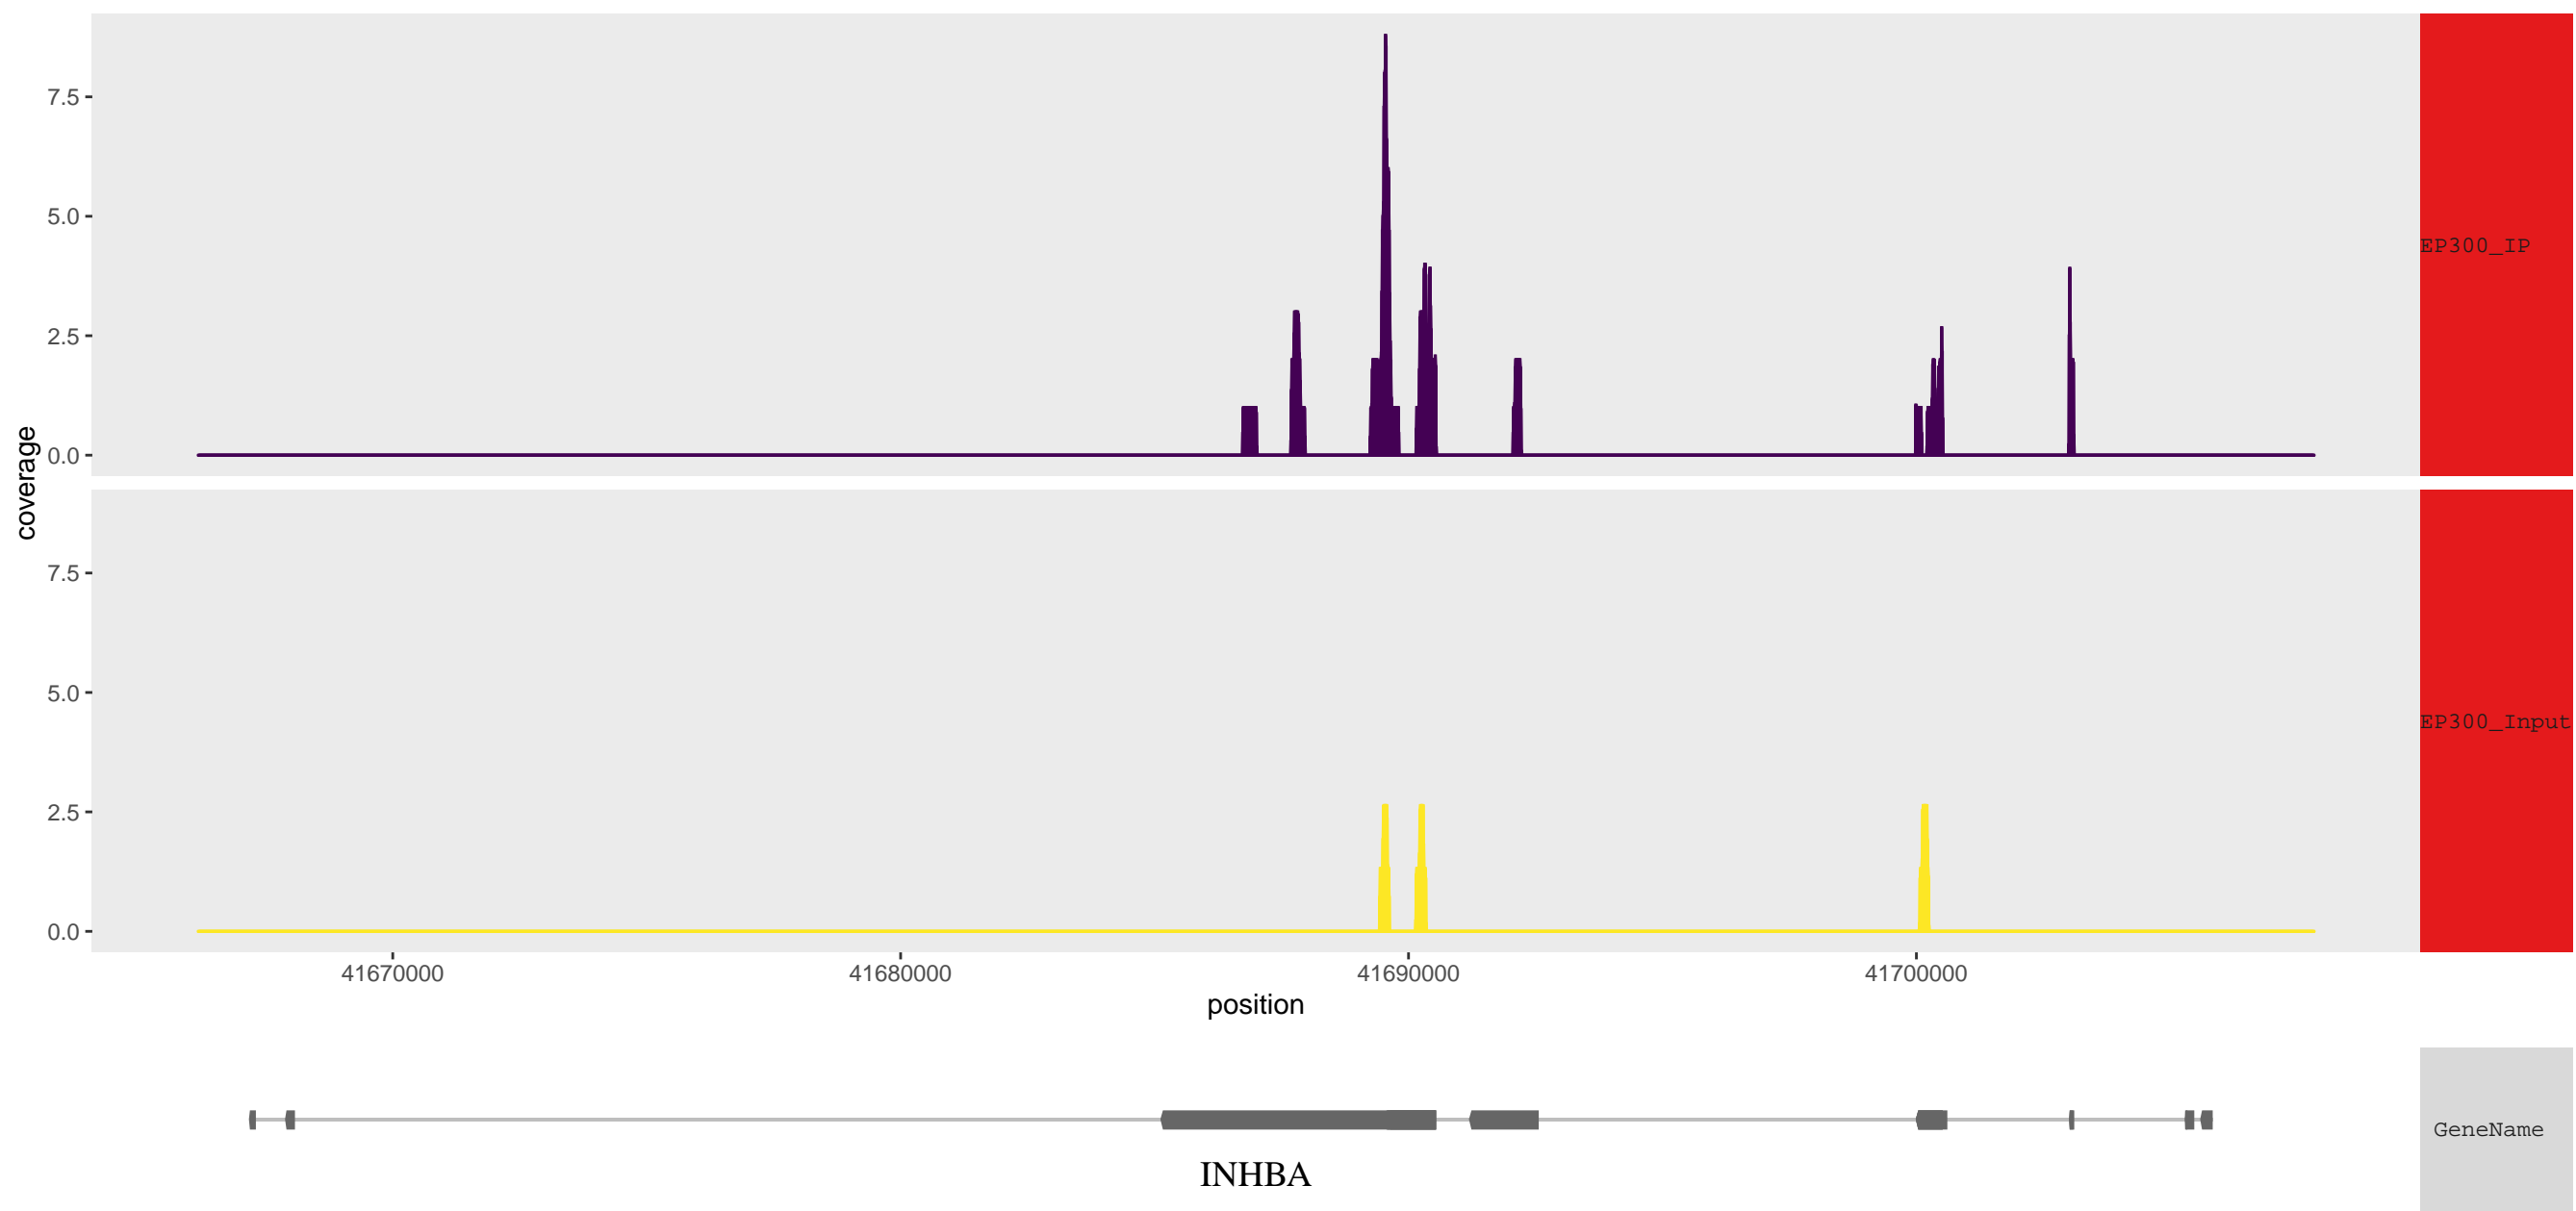

Supplement: MOESM2 [file 25976090]
